# Supplementary material
Source: ML conference proceedings conference paper supplement (https://openreview.net/forum?id=uKv5inrWeld)
Supplement: supplementary_material [file attachment]

## A Feature Transformations

We report all feature transformations along with their sources and dimensionalities applied to computer vision and NLP datasets in Table 6 and Table 7 respectively. All transformations can be found using their name and the corresponding source<sup>5</sup>

Table 6: Feature transformations for images as features.

| Transformation           | Source       | MNIST | CIFAR10 | CIFAR100 |
|--------------------------|--------------|-------|---------|----------|
| <i>Raw</i>               | -            | ✓     | ✓       | ✓        |
| PCA (d=32)               | scikit-learn | ✓     | ✓       | ✓        |
| PCA (d=64)               | scikit-learn | ✓     | ✓       | ✓        |
| PCA (d=128)              | scikit-learn | ✓     | ✓       | ✓        |
| NCA (d=64)               | scikit-learn | ✓     | ✓       | ✓        |
| AlexNet(d=4096)          | PyTorch-Hub  | ✓     | ✓       | ✓        |
| GoogleNet (d=1024)       | PyTorch-Hub  | ✓     | ✓       | ✓        |
| VGG16 (d=4096)           | PyTorch-Hub  | ✓     | ✓       | ✓        |
| VGG19 (d=4096)           | PyTorch-Hub  | ✓     | ✓       | ✓        |
| ResNet50-V2 (d=2048)     | TF-Hub       | ✓     | ✓       | ✓        |
| ResNet101-V2 (d=2048)    | TF-Hub       | ✓     | ✓       | ✓        |
| ResNet152-V2 (d=2048)    | TF-Hub       | ✓     | ✓       | ✓        |
| InceptionV3 (d=2048)     | TF-Hub       | ✓     | ✓       | ✓        |
| EfficientNet-B0 (d=1280) | TF-Hub       | ✓     | ✓       | ✓        |
| EfficientNet-B1 (d=1280) | TF-Hub       | ✓     | ✓       | ✓        |
| EfficientNet-B2 (d=1408) | TF-Hub       | ✓     | ✓       | ✓        |
| EfficientNet-B3 (d=1536) | TF-Hub       | ✓     | ✓       | ✓        |
| EfficientNet-B4 (d=1792) | TF-Hub       | ✓     | ✓       | ✓        |
| EfficientNet-B5 (d=2048) | TF-Hub       | ✓     | ✓       | ✓        |
| EfficientNet-B6 (d=2304) | TF-Hub       | ✓     | ✓       | ✓        |
| EfficientNet-B7 (d=2560) | TF-Hub       | ✓     | ✓       | ✓        |

Table 7: Feature transformations for natural language as features.

| Transformation                           | Source       | IMDB | SST2 | YELP |
|------------------------------------------|--------------|------|------|------|
| BOW                                      | scikit-learn | ✓    | ✓    | ✗    |
| BOW-TFIDF                                | scikit-learn | ✓    | ✓    | ✗    |
| PCA (d=8)                                | scikit-learn | ✓    | ✓    | ✗    |
| PCA (d=16)                               | scikit-learn | ✓    | ✓    | ✗    |
| PCA (d=32)                               | scikit-learn | ✓    | ✓    | ✗    |
| PCA (d=64)                               | scikit-learn | ✓    | ✓    | ✗    |
| PCA (d=128)                              | scikit-learn | ✓    | ✓    | ✗    |
| ELMO (d=1024)                            | TF-Hub       | ✓    | ✓    | ✓    |
| NNLM-EN (d=50)                           | TF-Hub       | ✓    | ✓    | ✓    |
| NNLM-EN-WITH-NORMALIZATION (d=50)        | TF-Hub       | ✓    | ✓    | ✓    |
| NNLM-EN (d=128)                          | TF-Hub       | ✓    | ✓    | ✓    |
| NNLM-EN-WITH-NORMALIZATION (d=128)       | TF-Hub       | ✓    | ✓    | ✓    |
| Universal Sentence Encoder (USE) (d=512) | TF-Hub       | ✓    | ✓    | ✓    |
| BERT-Base (d=678)                        | PyTorch-Hub  | ✓    | ✓    | ✓    |

<sup>5</sup>TensorFlow Hub: <https://tfhub.dev>, PyTorch Hub: <https://pytorch.org/hub>, and scikit-learn: <https://scikit-learn.org/>.

## B Extended Results

### B.1 No Transformation / Raw

To see the impact of choosing the best feature transformation per method, we report the results on the raw features (i.e., pixel values) for the vision datasets in Figure 5 and Table 8, noting that NLP datasets do not come with any natural *raw* representations. For the method achieving good lower and upper bounds (i.e., kNN and GHP), we see that for both CIFAR variants, they constantly overestimate both the upper and lower bound. For the other methods, selecting the best hyper-parameters leads to non-informative variants.

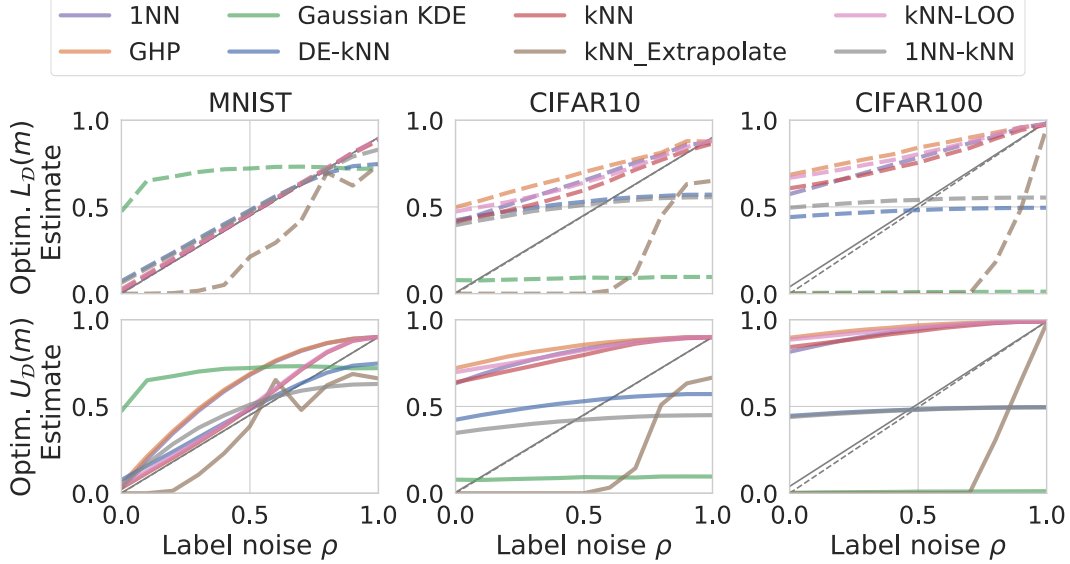

Figure 5: Computer vision datasets on raw features.

Figure 6: Evolution of the BER for selecting hyper-parameters only on the raw pixels that minimize **(top row, each)**  $L_{\mathcal{D}}(m)$  and **(bottom row, each)**  $U_{\mathcal{D}}(m)$ .

Table 8:  $L_{\mathcal{D}}(m)$  and  $U_{\mathcal{D}}(m)$ : The optimal values per method on raw pixel values.

|          | DE-kNN | KDE  | GHP  | 1NN-kNN | 1NN  | kNN  | kNN-LOO | kNN_Ext |
|----------|--------|------|------|---------|------|------|---------|---------|
| MNIST    | 0.12   | 0.64 | 0.03 | 0.07    | 0.02 | 0.02 | 0.03    | 0.50    |
| CIFAR10  | 0.47   | 0.83 | 0.55 | 0.45    | 0.46 | 0.39 | 0.46    | 0.69    |
| CIFAR100 | 0.49   | 0.98 | 0.66 | 0.49    | 0.54 | 0.53 | 0.61    | 0.71    |
| MNIST    | 0.12   | 0.64 | 0.34 | 0.22    | 0.32 | 0.09 | 0.11    | 0.43    |
| CIFAR10  | 0.47   | 0.83 | 0.85 | 0.48    | 0.79 | 0.75 | 0.80    | 0.66    |
| CIFAR100 | 0.49   | 0.98 | 0.89 | 0.49    | 0.84 | 0.84 | 0.88    | 0.65    |

## B.2 Optimal $L_{\mathcal{D}}(m)$ and $U_{\mathcal{D}}(m)$ .

In this section we provide additional visualizations to support the findings in Section 4.2, completing Figure 2. We observe that 1NN, kNN, kNN-LOO and GHP closely follow the evolution of the BER and that for them the main contributions to  $L_{\mathcal{D}}(m)$  and  $U_{\mathcal{D}}(m)$  come from  $L_{\mathcal{D},\triangleright}(m)$  and  $U_{\mathcal{D},\triangleright}(m)$ . This will be improved as more transformations become available, thus reducing the bias. For DE-kNN, KDE and kNN-Extrapolate we clearly see difficulties in following the evolution of the BER, often visualized in the bottom-right corner, resulting in large  $L_{\mathcal{D},\triangleleft}(m)$  and/or  $U_{\mathcal{D},\triangleleft}(m)$ .

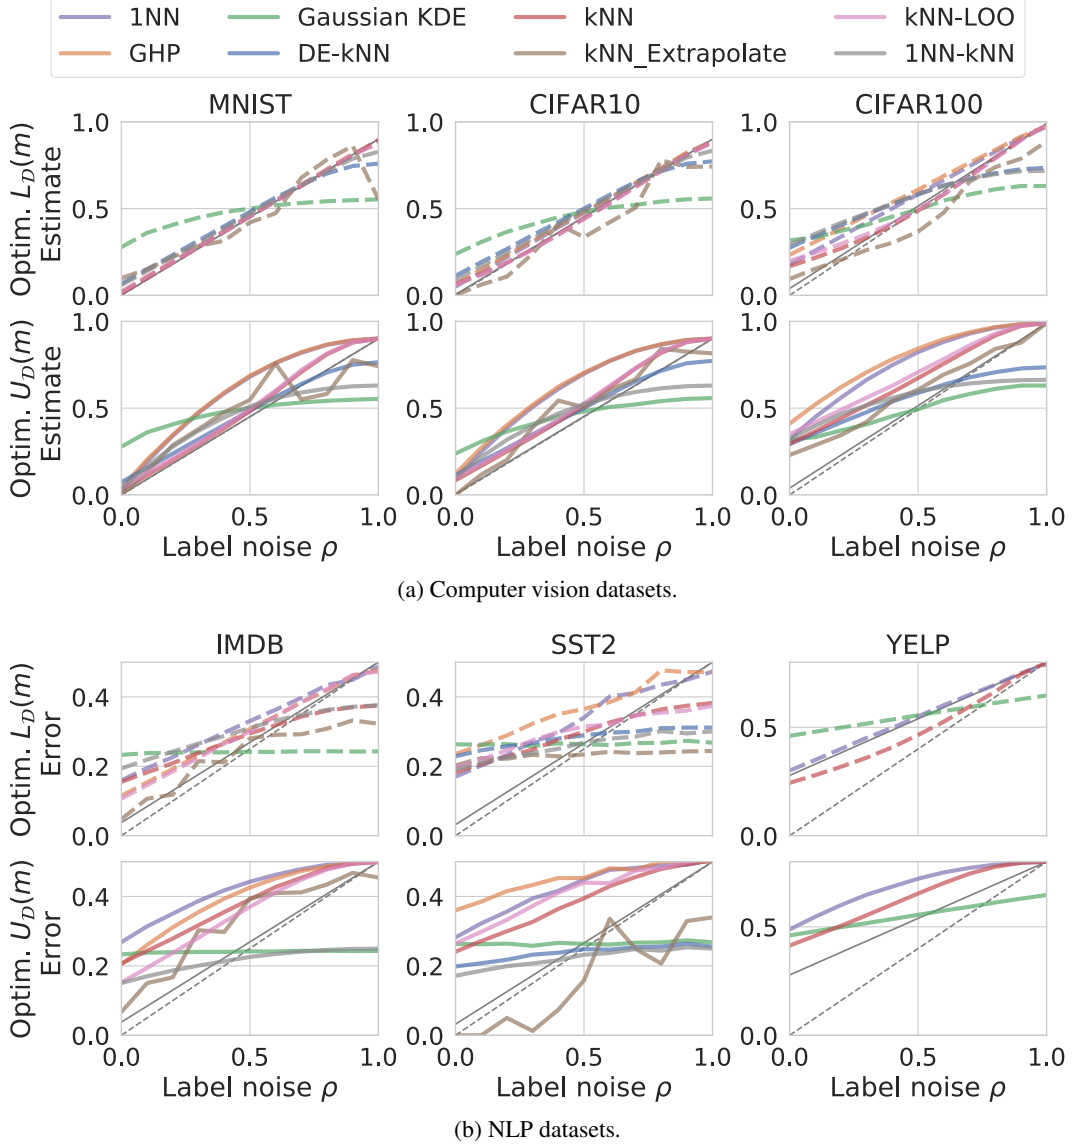

Figure 7: Evolution of the BER for selecting hyper-parameters and transformations that minimize (top row, each)  $L_{\mathcal{D}}(m)$  and (bottom row, each)  $U_{\mathcal{D}}(m)$ .

### B.3 Further Example Plots

In this section we present example plots produced by FeeBee. For simplicity, we focus only on two datasets and two methods. In order to have comparable lower and upper bounds, we fix the transformation in each figure.

We observe that 1NN performs better than kNN-Extrapolate for the lower bound, clearly following the evolution of the BER. We also observe that for both the lower bound is always below upper bound.

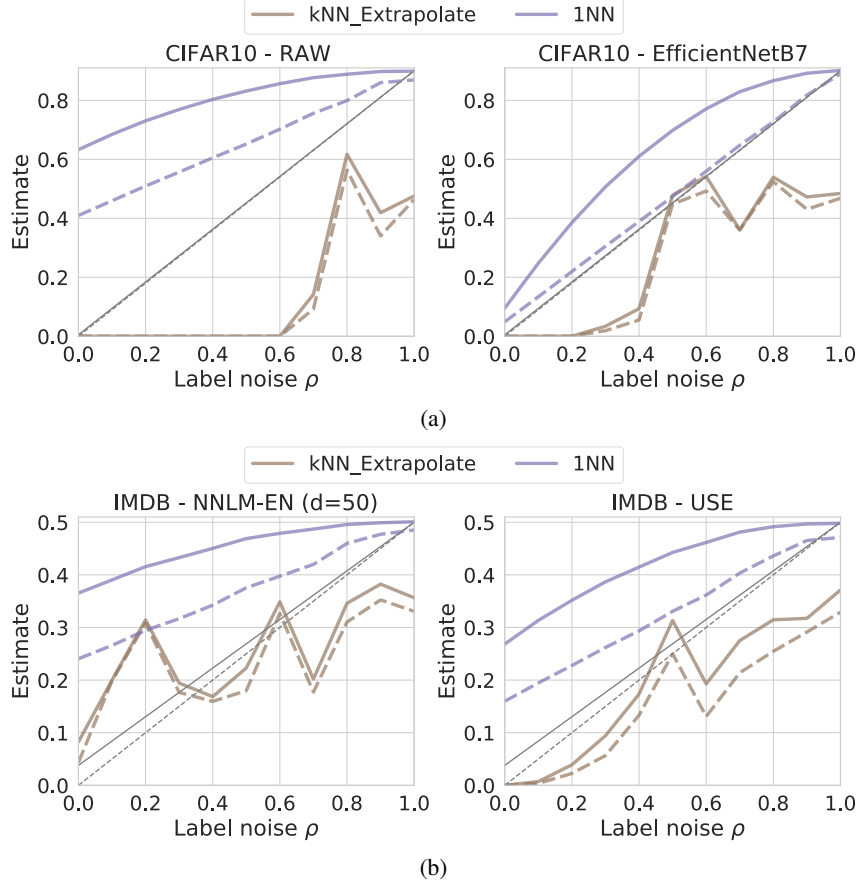

Figure 8: Example plots of  $L_{\mathcal{D}}(m)$  and  $U_{\mathcal{D}}(m)$  for **(a)** CIFAR10 over raw and EfficientNetB7, and **(b)** IMDB over NNLM-EN ( $d = 50$ ) and USE.

## C Tables

In this section we provide tables with optimal values of scores  $L_{\mathcal{D}}(m)$  and  $U_{\mathcal{D}}(m)$ , for every dataset and every method, reporting the hyper-parameters and transformation that yield that score, together with the upper ( $L_{\mathcal{D},\triangleright}, U_{\mathcal{D},\triangleright}$ ) and lower areas ( $L_{\mathcal{D},\triangleleft}, U_{\mathcal{D},\triangleleft}$ ) that contribute to the scores.

### C.1 Optimal $L_{\mathcal{D}}(m)$ .

Table 9: MNIST - Optimal  $L_{\mathcal{D}}(m)$

| Method          | Variant               | Transformation | $L_{\mathcal{D}}(m)$ | $L_{\mathcal{D},\triangleleft}(m)$ | $L_{\mathcal{D},\triangleright}(m)$ |
|-----------------|-----------------------|----------------|----------------------|------------------------------------|-------------------------------------|
| kNN             | dist=cosine, k=2      | NCA (d=64)     | 0.02                 | 0.00                               | 0.01                                |
| 1NN             | dist=cosine           | NCA (d=64)     | 0.02                 | 0.01                               | 0.01                                |
| kNN-LOO         | dist=cosine, k=2      | NCA (d=64)     | 0.03                 | 0.01                               | 0.02                                |
| GHP             | default               | PCA (d=32)     | 0.03                 | 0.00                               | 0.02                                |
| 1NN-kNN         | dist=cosine, k=21     | PCA (d=32)     | 0.07                 | 0.02                               | 0.05                                |
| DE-kNN          | dist=squared_l2, k=15 | PCA (d=32)     | 0.11                 | 0.05                               | 0.06                                |
| kNN_Extrapolate | dist=cosine, k=10     | PCA (d=32)     | 0.28                 | 0.15                               | 0.13                                |
| Gaussian KDE    | B=0.05                | VGG16          | 0.41                 | 0.18                               | 0.23                                |

Table 10: CIFAR10 - Optimal  $L_{\mathcal{D}}(m)$

| Method          | Variant               | Transformation  | $L_{\mathcal{D}}(m)$ | $L_{\mathcal{D},\triangleleft}(m)$ | $L_{\mathcal{D},\triangleright}(m)$ |
|-----------------|-----------------------|-----------------|----------------------|------------------------------------|-------------------------------------|
| kNN-LOO         | dist=squared_l2, k=3  | EfficientNet-B3 | 0.03                 | 0.01                               | 0.02                                |
| kNN             | dist=squared_l2, k=3  | EfficientNet-B2 | 0.03                 | 0.01                               | 0.02                                |
| 1NN             | dist=squared_l2       | EfficientNet-B7 | 0.05                 | 0.00                               | 0.05                                |
| GHP             | default               | EfficientNet-B4 | 0.07                 | 0.00                               | 0.07                                |
| 1NN-kNN         | dist=squared_l2, k=22 | EfficientNet-B7 | 0.10                 | 0.02                               | 0.08                                |
| DE-kNN          | dist=squared_l2, k=18 | EfficientNet-B7 | 0.14                 | 0.04                               | 0.11                                |
| kNN_Extrapolate | dist=squared_l2, k=3  | PCA (d=32)      | 0.34                 | 0.23                               | 0.11                                |
| Gaussian KDE    | B=0.1                 | ResNet152-V2    | 0.36                 | 0.19                               | 0.18                                |

Table 11: CIFAR100 - Optimal  $L_{\mathcal{D}}(m)$

| Method          | Variant               | Transformation  | $L_{\mathcal{D}}(m)$ | $L_{\mathcal{D},\triangleleft}(m)$ | $L_{\mathcal{D},\triangleright}(m)$ |
|-----------------|-----------------------|-----------------|----------------------|------------------------------------|-------------------------------------|
| kNN             | dist=cosine, k=5      | EfficientNet-B5 | 0.06                 | 0.01                               | 0.05                                |
| kNN-LOO         | dist=cosine, k=6      | EfficientNet-B6 | 0.07                 | 0.01                               | 0.07                                |
| 1NN             | dist=cosine           | EfficientNet-B7 | 0.14                 | 0.00                               | 0.14                                |
| GHP             | default               | EfficientNet-B7 | 0.20                 | 0.00                               | 0.20                                |
| kNN_Extrapolate | dist=squared_l2, k=1  | PCA (d=32)      | 0.22                 | 0.17                               | 0.05                                |
| DE-kNN          | dist=squared_l2, k=4  | EfficientNet-B7 | 0.27                 | 0.10                               | 0.18                                |
| 1NN-kNN         | dist=squared_l2, k=12 | EfficientNet-B7 | 0.29                 | 0.10                               | 0.19                                |
| Gaussian KDE    | B=0.1                 | VGG19           | 0.31                 | 0.18                               | 0.14                                |

Table 12: IMDB - Optimal  $L_{\mathcal{D}}(m)$

| Method          | Variant              | Transformation | $L_{\mathcal{D}}(m)$ | $L_{\mathcal{D},\triangleleft}(m)$ | $L_{\mathcal{D},\triangleright}(m)$ |
|-----------------|----------------------|----------------|----------------------|------------------------------------|-------------------------------------|
| kNN-LOO         | dist=squared_l2, k=1 | USE            | 0.15                 | 0.01                               | 0.14                                |
| GHP             | default              | USE            | 0.16                 | 0.01                               | 0.16                                |
| kNN             | dist=cosine, k=9     | USE            | 0.25                 | 0.09                               | 0.16                                |
| 1NN             | dist=squared_l2      | USE            | 0.25                 | 0.01                               | 0.24                                |
| kNN_Extrapolate | dist=squared_l2, k=6 | PCA (d=16)     | 0.25                 | 0.19                               | 0.06                                |
| 1NN-kNN         | dist=cosine, k=4     | PCA (d=32)     | 0.31                 | 0.09                               | 0.22                                |
| Gaussian KDE    | B=0.0025             | PCA (d=8)      | 0.49                 | 0.29                               | 0.20                                |

Table 13: SST2 - Optimal  $L_{\mathcal{D}}(m)$ 

| Method          | Variant              | Transformation       | $L_{\mathcal{D}}(m)$ | $L_{\mathcal{D},\triangleleft}(m)$ | $L_{\mathcal{D},\triangleright}(m)$ |
|-----------------|----------------------|----------------------|----------------------|------------------------------------|-------------------------------------|
| kNN             | dist=cosine, k=10    | BOW-TFIDF            | 0.29                 | 0.08                               | 0.20                                |
| 1NN             | dist=cosine          | ELMO                 | 0.32                 | 0.02                               | 0.30                                |
| kNN-LOO         | dist=cosine, k=7     | USE                  | 0.34                 | 0.10                               | 0.24                                |
| 1NN-kNN         | dist=cosine, k=3     | ELMO                 | 0.38                 | 0.20                               | 0.18                                |
| DE-kNN          | dist=squared_l2, k=4 | NNLM-EN-NORM (d=128) | 0.42                 | 0.17                               | 0.25                                |
| GHP             | default              | USE                  | 0.44                 | 0.01                               | 0.42                                |
| kNN_Extrapolate | dist=squared_l2, k=2 | PCA (d=8)            | 0.47                 | 0.29                               | 0.18                                |
| Gaussian KDE    | B=0.0025             | PCA (d=16)           | 0.49                 | 0.24                               | 0.25                                |

Table 14: YELP - Optimal  $L_{\mathcal{D}}(m)$ 

| Method       | Variant              | Transformation | $L_{\mathcal{D}}(m)$ | $L_{\mathcal{D},\triangleleft}(m)$ | $L_{\mathcal{D},\triangleright}(m)$ |
|--------------|----------------------|----------------|----------------------|------------------------------------|-------------------------------------|
| kNN          | dist=squared_l2, k=9 | USE            | 0.00                 | 0.00                               | 0.00                                |
| 1NN          | dist=squared_l2      | USE            | 0.03                 | 0.00                               | 0.03                                |
| Gaussian KDE | B=0.05               | NNLM-EN (d=50) | 0.20                 | 0.06                               | 0.14                                |

## C.2 Optimal $U_{\mathcal{D}}(m)$ .

Table 15: MNIST - Optimal  $U_{\mathcal{D}}(m)$

| Method          | Variant               | Transformation | $U_{\mathcal{D}}(m)$ | $U_{\mathcal{D},\triangleleft}(m)$ | $U_{\mathcal{D},\triangleright}(m)$ |
|-----------------|-----------------------|----------------|----------------------|------------------------------------|-------------------------------------|
| kNN             | dist=cosine, k=10     | NCA (d=64)     | 0.09                 | 0.00                               | 0.09                                |
| kNN-LOO         | dist=cosine, k=10     | NCA (d=64)     | 0.11                 | 0.00                               | 0.11                                |
| DE-kNN          | dist=squared_l2, k=16 | PCA (d=32)     | 0.11                 | 0.04                               | 0.07                                |
| 1NN-kNN         | dist=cosine, k=3      | NCA (d=64)     | 0.22                 | 0.12                               | 0.09                                |
| 1NN             | dist=cosine           | NCA (d=64)     | 0.32                 | 0.00                               | 0.32                                |
| GHP             | default               | PCA (d=32)     | 0.33                 | 0.00                               | 0.33                                |
| kNN_Extrapolate | dist=cosine, k=10     | PCA (d=128)    | 0.37                 | 0.16                               | 0.21                                |
| Gaussian KDE    | B=0.05                | VGG16          | 0.41                 | 0.18                               | 0.23                                |

Table 16: CIFAR10 - Optimal  $U_{\mathcal{D}}(m)$

| Method          | Variant               | Transformation  | $U_{\mathcal{D}}(m)$ | $U_{\mathcal{D},\triangleleft}(m)$ | $U_{\mathcal{D},\triangleright}(m)$ |
|-----------------|-----------------------|-----------------|----------------------|------------------------------------|-------------------------------------|
| DE-kNN          | dist=squared_l2, k=18 | EfficientNet-B7 | 0.15                 | 0.04                               | 0.11                                |
| kNN             | dist=cosine, k=10     | EfficientNet-B7 | 0.15                 | 0.00                               | 0.15                                |
| kNN-LOO         | dist=cosine, k=10     | EfficientNet-B4 | 0.17                 | 0.00                               | 0.17                                |
| kNN_Extrapolate | dist=squared_l2, k=3  | PCA (d=32)      | 0.20                 | 0.04                               | 0.16                                |
| 1NN-kNN         | dist=squared_l2, k=3  | EfficientNet-B7 | 0.26                 | 0.12                               | 0.14                                |
| Gaussian KDE    | B=0.1                 | ResNet152-V2    | 0.36                 | 0.19                               | 0.18                                |
| 1NN             | dist=cosine           | EfficientNet-B7 | 0.37                 | 0.00                               | 0.37                                |
| GHP             | default               | EfficientNet-B4 | 0.39                 | 0.00                               | 0.39                                |

Table 17: CIFAR100 - Optimal  $U_{\mathcal{D}}(m)$

| Method          | Variant              | Transformation  | $U_{\mathcal{D}}(m)$ | $U_{\mathcal{D},\triangleleft}(m)$ | $U_{\mathcal{D},\triangleright}(m)$ |
|-----------------|----------------------|-----------------|----------------------|------------------------------------|-------------------------------------|
| kNN_Extrapolate | dist=cosine, k=7     | PCA (d=32)      | 0.21                 | 0.02                               | 0.19                                |
| DE-kNN          | dist=squared_l2, k=4 | EfficientNet-B6 | 0.28                 | 0.09                               | 0.19                                |
| Gaussian KDE    | B=0.1                | VGG19           | 0.31                 | 0.18                               | 0.14                                |
| kNN             | dist=cosine, k=10    | EfficientNet-B7 | 0.31                 | 0.00                               | 0.31                                |
| 1NN-kNN         | dist=squared_l2, k=3 | EfficientNet-B7 | 0.36                 | 0.14                               | 0.22                                |
| kNN-LOO         | dist=cosine, k=10    | EfficientNet-B6 | 0.37                 | 0.00                               | 0.37                                |
| 1NN             | dist=cosine          | EfficientNet-B7 | 0.49                 | 0.00                               | 0.49                                |
| GHP             | default              | EfficientNet-B7 | 0.55                 | 0.00                               | 0.55                                |

Table 18: IMDB - Optimal  $U_{\mathcal{D}}(m)$

| Method          | Variant              | Transformation | $U_{\mathcal{D}}(m)$ | $U_{\mathcal{D},\triangleleft}(m)$ | $U_{\mathcal{D},\triangleright}(m)$ |
|-----------------|----------------------|----------------|----------------------|------------------------------------|-------------------------------------|
| kNN_Extrapolate | dist=squared_l2, k=6 | PCA (d=16)     | 0.28                 | 0.03                               | 0.25                                |
| kNN-LOO         | dist=squared_l2, k=9 | USE            | 0.34                 | 0.00                               | 0.34                                |
| 1NN-kNN         | dist=cosine, k=2     | PCA (d=32)     | 0.39                 | 0.29                               | 0.10                                |
| kNN             | dist=squared_l2, k=9 | USE            | 0.43                 | 0.00                               | 0.43                                |
| Gaussian KDE    | B=0.0025             | PCA (d=8)      | 0.49                 | 0.29                               | 0.20                                |
| GHP             | default              | USE            | 0.51                 | 0.00                               | 0.51                                |
| 1NN             | dist=squared_l2      | USE            | 0.60                 | 0.00                               | 0.60                                |

Table 19: SST2 - Optimal  $U_{\mathcal{D}}(m)$ 

| Method          | Variant              | Transformation  | $U_{\mathcal{D}}(m)$ | $U_{\mathcal{D},\triangleleft}(m)$ | $U_{\mathcal{D},\triangleright}(m)$ |
|-----------------|----------------------|-----------------|----------------------|------------------------------------|-------------------------------------|
| 1NN-kNN         | dist=cosine, k=2     | NNLM-EN (d=128) | 0.42                 | 0.29                               | 0.13                                |
| DE-kNN          | dist=squared_l2, k=2 | USE             | 0.43                 | 0.27                               | 0.17                                |
| kNN             | dist=cosine, k=10    | BOW-TFIDF       | 0.48                 | 0.00                               | 0.48                                |
| Gaussian KDE    | B=0.0025             | PCA (d=16)      | 0.49                 | 0.24                               | 0.25                                |
| kNN-LOO         | dist=cosine, k=10    | USE             | 0.57                 | 0.00                               | 0.57                                |
| kNN_Extrapolate | dist=squared_l2, k=2 | USE             | 0.61                 | 0.49                               | 0.12                                |
| 1NN             | dist=cosine          | ELMO            | 0.63                 | 0.00                               | 0.63                                |
| GHP             | default              | ELMO            | 0.73                 | 0.00                               | 0.73                                |

Table 20: YELP - Optimal  $U_{\mathcal{D}}(m)$ 

| Method       | Variant           | Transformation | $U_{\mathcal{D}}(m)$ | $U_{\mathcal{D},\triangleleft}(m)$ | $U_{\mathcal{D},\triangleright}(m)$ |
|--------------|-------------------|----------------|----------------------|------------------------------------|-------------------------------------|
| Gaussian KDE | B=0.05            | NNLM-EN (d=50) | 0.20                 | 0.06                               | 0.14                                |
| kNN          | dist=cosine, k=10 | USE            | 0.25                 | 0.00                               | 0.24                                |
| 1NN          | dist=squared_l2   | USE            | 0.38                 | 0.00                               | 0.38                                |
